# Supplementary material for: Structurally optimized intrinsic defect carbon driven polysulfide reduction reaction for quantum dot sensitized solar cells
Source: Royal Society of Chemistry journal article supplement (doi:10.1039/d2cy00890d), 2022-01-01
Supplement: d2cy00890d1.pdf [file d2cy00890d1.pdf]

Supplemental material

## Structurally optimized intrinsic defect carbon driven polysulfide reduction reaction for quantum dot sensitized solar cells

Wenhua Li <sup>a</sup>, Shule Zhang <sup>a</sup>, Bo Peng <sup>a</sup>, Qianqiao Chen <sup>a, \*</sup>, Qin Zhong <sup>a, \*</sup>

<sup>a</sup> Nanjing University of Science and Technology, Nanjing, People's Republic of China, 210094

\* Corresponding author.

E-mail: cq@njust.edu.cn (Qianqiao Chen); zq304@njust.edu.cn (Qin Zhong); lwh3203@qq.com (Wenhua Li);

shulezhang@163.com (Shule Zhang); 913866182@qq.com (Bo Peng)

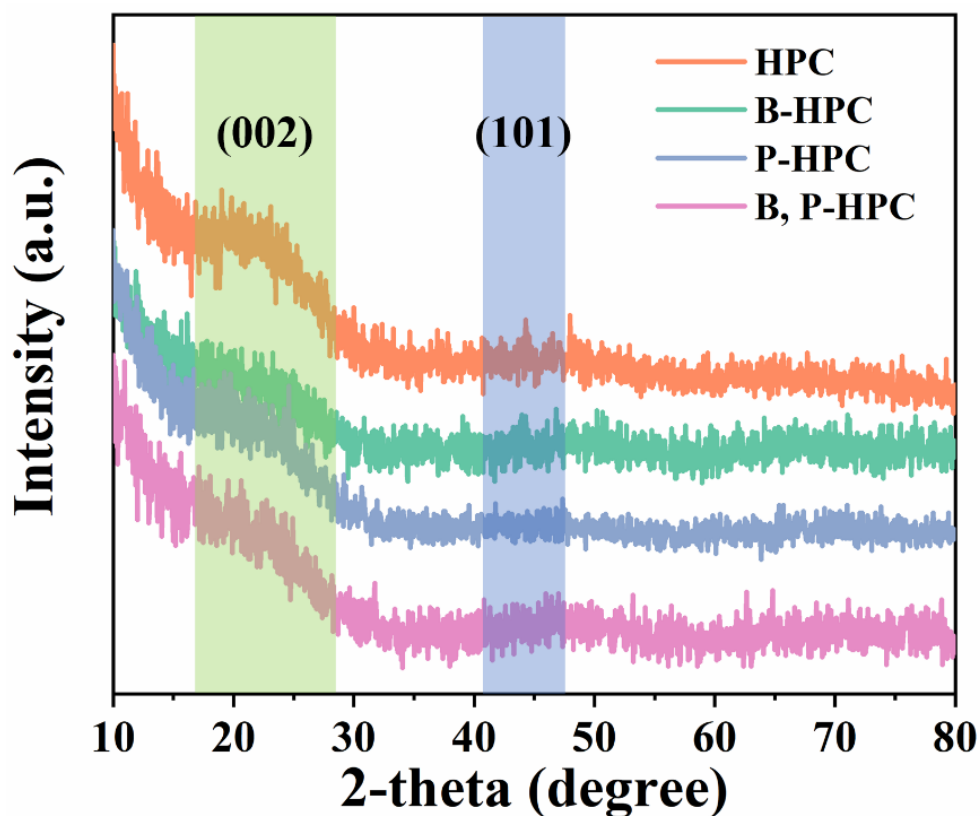

Figure S1 XRD pattern of all CE catalysts.

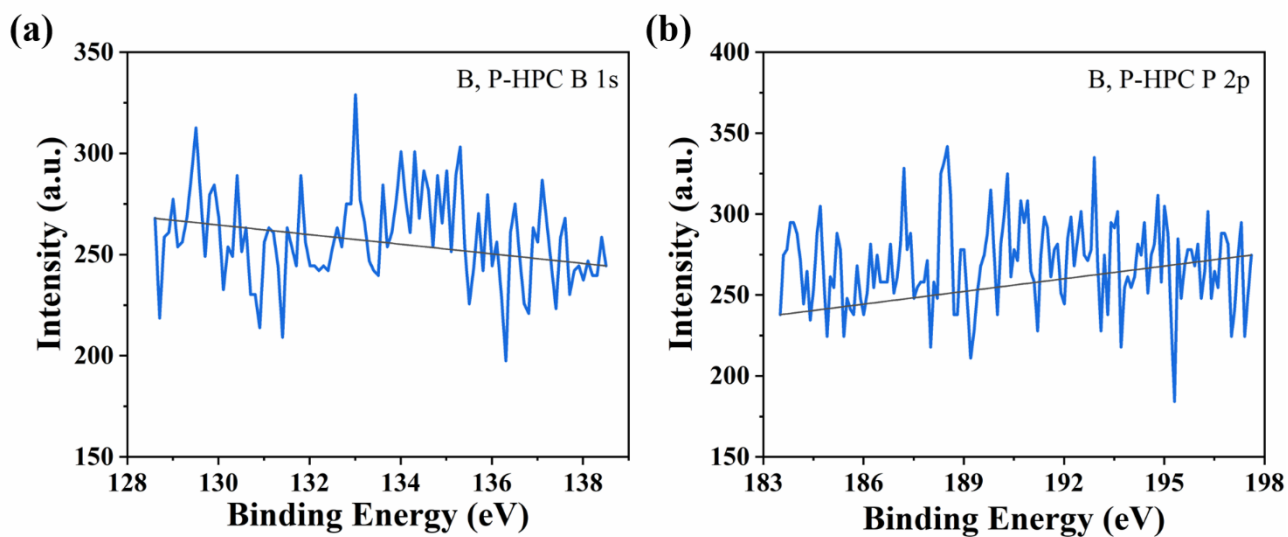

**Figure S2** High-resolution B 1s and P 2p XPS spectra of B, P-HPC.

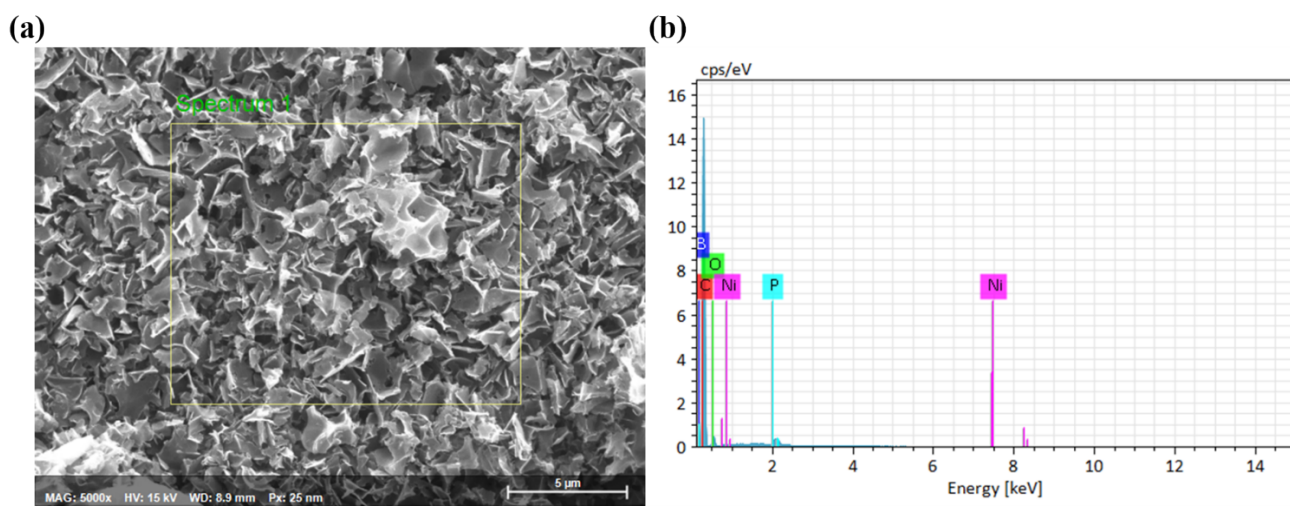

**Figure S3** (a) SEM images and (b) EDS of B, P-HPC catalyst.

**Table S1** XPS element ratio of HPC and B, P-HPC.

| HPC Quantification      |                  |           |                |           |
|-------------------------|------------------|-----------|----------------|-----------|
|                         | Atomic conc. [%] | Error [%] | Mass conc. [%] | Error [%] |
| C 1s                    | 96.33            | 0.31      | 95.17          | 0.40      |
| O 1s                    | 3.67             | 0.31      | 4.83           | 0.40      |
| B, P-HPC Quantification |                  |           |                |           |
|                         | Atomic conc. [%] | Error [%] | Mass conc. [%] | Error [%] |
| C 1s                    | 95.52            | 0.30      | 94.15          | 0.38      |
| O 1s                    | 4.41             | 0.29      | 5.79           | 0.37      |
| B 1s                    | 0.07             | 0.07      | 0.06           | 0.06      |
| P 2p                    | 0.00             |           | 0.00           |           |

**Table S2** EDS parameters of B, P-HPC.

| Elements | Atomic number | Normalized mass conc. (%) | Atomic conc. (%) |
|----------|---------------|---------------------------|------------------|
| B        | 5             | 0.06                      | 0.07             |
| C        | 6             | 89.46                     | 91.91            |
| O        | 8             | 10.35                     | 7.98             |
| P        | 15            | 0.08                      | 0.03             |
| Ni       | 28            | 0.05                      | 0.01             |

**Table S3** Resistivity of all catalysts.

| Catalysts                           | HPC  | B-HPC | P-HPC | B, P-HPC |
|-------------------------------------|------|-------|-------|----------|
| $\rho$ ( $\Omega \cdot \text{cm}$ ) | 2.62 | 4.12  | 3.39  | 3.76     |

**Table S4** Comparison of photoelectrochemical performances of CdS/CdSe/ZnS co-sensitized QDSSCs with different counter electrodes, and the EIS results ( $R_{ct}$ ) for the symmetrical dummy cells <sup>1</sup>.

| CEs                                                         | $J_{sc}$ (mA ▪ cm <sup>-2</sup> ) | $V_{oc}$ (V) | FF   | PCE (%) | Active Area (cm <sup>2</sup> ) | $R_{ct}$ (Ω ▪ cm <sup>2</sup> ) | Refs      |
|-------------------------------------------------------------|-----------------------------------|--------------|------|---------|--------------------------------|---------------------------------|-----------|
| B, P-HPC                                                    | 16.03                             | 0.52         | 0.55 | 4.62    | 0.25                           | 0.56                            | This work |
| Iron sulfide/carbon                                         | 19.57                             | 0.45         | 0.64 | 5.61    | -                              | 2.86                            | 2         |
| CB/Cu <sub>x</sub> S-3                                      | 16.55                             | 0.58         | 0.57 | 5.50    | 0.16                           | 3.35                            | 3         |
| FTO/Cu <sub>2</sub> S/PbS                                   | 18.08                             | 0.55         | 0.54 | 5.28    | 0.16                           | 0.19                            | 4         |
| Double-shelled                                              |                                   |              |      |         |                                |                                 |           |
| Cu <sub>2-x</sub> Se nanocages                              | 16.42                             | 0.67         | 0.43 | 4.76    | 0.20                           | 2.94                            | 5         |
| CoS/NC-30                                                   | 14.68                             | 0.55         | 0.55 | 4.46    | 0.25                           | 14.47                           | 6         |
| DW-Cu <sub>2-x</sub> Se/Cu <sub>7</sub> S <sub>4</sub> -HNB | 23.02                             | 0.52         | 0.36 | 4.38    | 0.16                           | 7.10                            | 7         |
| CuS2h                                                       | 15.52                             | 0.61         | 0.45 | 4.29    | 0.27                           | 1.18                            | 8         |
| CuS 2h                                                      | 14.31                             | 0.60         | 0.49 | 4.27    | -                              | -                               | 9         |
| rGO-Cu <sub>2</sub> S (5)                                   | 17.20                             | 0.56         | 0.44 | 4.26    | 0.16                           | 0.75                            | 10        |
| HFCuS                                                       | 15.37                             | 0.61         | 0.45 | 4.25    | -                              | -                               | 11        |
| PACuS4                                                      | 13.35                             | 0.59         | 0.53 | 4.20    | -                              | -                               | 12        |
| Cu <sub>x</sub> S C230                                      | 13.52                             | 0.63         | 0.46 | 3.88    | -                              | -                               | 13        |
| CoS                                                         | 11.62                             | 0.60         | 0.53 | 3.67    | 0.25                           | 6.45                            | 14        |
| PbS                                                         | 15.11                             | 0.57         | 0.41 | 3.49    | 0.20                           | 352.80                          | 15        |
| NiS120                                                      | 11.67                             | 0.60         | 0.47 | 3.25    | 0.27                           | 7.96                            | 16        |
| CISE-20min                                                  | 14.74                             | 0.55         | 0.36 | 2.92    | 0.20                           | 440                             | 17        |
| Cu <sub>2</sub> S                                           | 6.89                              | 0.57         | 0.25 | 1.01    | 0.16                           | -                               | 18        |

## References

1. W. Li, S. Zhang, Q. Chen and Q. Zhong, *Catal. Sci. Technol.*, 2021, **11**, 2745-2752.

2. H. Geng, L. Zhu, W. Li and H. Liu, *Sol. Energy*, 2017, **147**, 61-67.
3. I. P. Liu, H. Teng and Y.-L. Lee, *J. Mater. Chem. A*, 2017, **5**, 23146-23157.
4. I.-R. Jo, J. A. Rajesh, Y.-H. Lee, J.-H. Park and K.-S. Ahn, *Appl. Surf. Sci.*, 2020, **525**, 146643.
5. Z. Hu, R. Zhou, W. Sun, J. Zhang, C.-S. Lee and J. Xu, *Mater. Today Energy*, 2017, **5**, 331-337.
6. W. Yang, Y. Sun, P. Yang and X. Chen, *J. Nanomater.*, 2019, **2019**, 1-8.
7. L. Ran and L. Yin, *CrystEngComm*, 2017, **19**, 5640-5652.
8. H.-J. Kim, B. Ko, C. V. V. M. Gopi, M. Venkata-Haritha and Y.-S. Lee, *Electroanal. Chem.*, 2017, **791**, 95-102.
9. C. D. Sunesh, C. V. V. M. Gopi, M. P. A. Muthalif, H.-J. Kim and Y. Choe, *Appl. Surf. Sci.*, 2017, **416**, 446-453.
10. A. Krishna Prasad, I.-R. Jo, S.-H. Kang and K.-S. Ahn, *Appl. Surf. Sci.*, 2021, **564**, 150393.
11. M. P. A. Muthalif and Y. Choe, *J. Colloid Interf. Sci.*, 2021, **595**, 15-24.
12. M. Panthakkal Abdul Muthalif, C. D. Sunesh and Y. Choe, *Appl. Surf. Sci.*, 2018, **440**, 1022-1026.
13. J. Deng, P. Zhang, L. Li, Y. Gou, J. Fang, Y. Lei, X. Song and Z. Yang, *J. Colloid Interf. Sci.*, 2020, **579**, 805-814.
14. A. E. Reddy, S. S. Rao, C. V. V. M. Gopi, T. Anitha, C. V. Thulasi-Varma, D. Punnoose and H.-J. Kim, *Chem. Phys. Lett.*, 2017, **687**, 238-243.
15. Y. Wang, Y. Huang, H. Li, Y. Zhou, L. Wan, H. Niu, Y. Li, J. Xu and R. Zhou, *IEEE J. Photovolt.*, 2018, **8**, 1670-1676.
16. Y.-S. Lee, C. V. V. M. Gopi, M. Venkata-Haritha, S. S. Rao and H.-J. Kim, *J. Photoch. Photobio. A*, 2017, **332**, 200-207.
17. H. Guo, R. Zhou, Y. Huang, L. Wan, W. Gan, H. Niu and J. Xu, *Ceram. Inter.*, 2018, **44**, 16092-16098.
18. E. Wu, J. Jin, S. Liu, D. Li, S. Gao, F. Deng, X. Yan, Y. Xiong and H. Tang, *Sci. Rep.*, 2019, **9**, 12337.
